# Supplementary material for: Blood Pressure in the First 6 Hours for Older Adults with Stroke after Endovascular therapy: A Pooled Analysis of the DEVT and RESCUE BT Randomized Clinical Trials
Source: Research Square preprint supplement (doi:10.21203/rs.3.rs-7033548/v1), 2025-07-22
Supplement: Supplementary file 1 [file b9b54ffd2dc9528f60606ff4.docx]

**Supplementary Material**

This appendix has been provided by the authors to give readers additional information

Table S1: Baseline characteristic of SBP in young and old patients

Table S2: The effect of SBP groups in young (≤140 mmHg vs. >140 mmHg) and old (≤120 mmHg vs. >120 mmHg) patients

Table S3. The association of SBP groups with clinical outcomes stratified by age in patients with successful recanalization

Table S4. Associations between SBP groups and outcomes in young (≤140 mmHg vs. >140 mmHg) and old (≤120 mmHg vs. >120 mmHg) patients with successful recanalization

**Table S1. Baseline characteristic of SBP stratified by age**

|  | Age 18-64 (n=267) | | |  | Age ≥ 65 (n=395) | | |  |
| --- | --- | --- | --- | --- | --- | --- | --- | --- |
|  | ≤120 mmHg  (n=117) | 120-140 mmHg  (n=113) | >140 mmHg  (n=37) | *P-value* | ≤120 mmHg  (n=143) | 120-140 mmHg  (n=187) | >140 mmHg  (n=65) | *P-*value |
| Patient’s characteristic |  |  |  |  |  |  |  |  |
| Male, n (%) | 73(62.39) | 81(71.68) | 26(70.27) | 0.30 | 64(44.76) | 91(48.66) | 38(58.46) | 0.19 |
| Admission NIHSS, median [IQR] | 14(11-19) | 14(10-18) | 13(8-18) | 0.27 | 16(13-20) | 17(13-20) | 16(11-20) | 0.77 |
| ASPECTS, median [IQR] | 7(6-9) | 8(7-9) | 7(7-9) | 0.05 | 8(7-9) | 8(7-9) | 8(7-9) | 0.45 |
| IVT, n (%) | 6(5.13) | 12(10.62) | 5(13.51) | 0.17 | 15(10.49) | 16(8.56) | 5(7.69) | 0.76 |
| Medical history, n (%) |  |  |  |  |  |  |  |  |
| Pre-stroke | 12(10.26) | 11(9.73) | 6(16.22) | 0.56 | 23(16.08) | 29(15.51) | 18(27.69) | 0.07 |
| Atrial fibrillation | 28(23.93) | 24(21.24) | 7(18.92) | 0.78 | 62(43.36) | 81(43.32) | 24(36.92) | 0.63 |
| Hypertension | 31(26.50) | 56(49.56) | 23(62.16) | <0.001 | 68(47.55) | 125(66.84) | 52(80.00) | <0.001 |
| Diabetes | 13(11.11) | 21(18.58) | 10(27.03) | 0.06 | 28(19.58) | 35(18.72) | 23(35.38) | 0.01 |
| ASITN/SR, grade, n (%) |  |  |  | 0.16 |  |  |  | 0.20 |
| 0-1 | 32(27.35) | 24(21.24) | 13(35.14) |  | 48(33.57) | 66(35.29) | 19(29.23) |  |
| 2 | 50(42.74) | 57(50.44) | 10(27.03) |  | 56(39.16) | 87(46.52) | 34(52.31) |  |
| 3-4 | 35(29.91) | 32(28.32) | 14(37.84) |  | 39(27.27) | 34(18.18) | 12(18.46) |  |
| Stroke etiology |  |  |  | 0.01 |  |  |  | 0.02a |
| Cardioembolism | 47(40.17) | 38(33.63) | 8(21.62) |  | 80(55.94) | 100(53.48) | 21(32.31) |  |
| Large artery atherosclerosis | 47(40.17) | 67(59.29) | 24(64.86) |  | 47(32.87) | 68(36.36) | 38(58.46) |  |
| unknown | 12(10.26) | 5(4.42) | 3(8.11) |  | 14(9.79) | 17(9.09) | 6(9.23) |  |
| Other | 11(9.40) | 3(2.65) | 2(5.41) |  | 2(1.40) | 1(1.07) | 0 |  |
| Procedure |  |  |  |  |  |  |  |  |
| Onset to recanalization time, min, median [IQR] | 497.00(329.50-728.00) | 529.00(326.50-810.00) | 536.00(356.00-817.50) | 0.61 | 465.00(303.00-660.00) | 431.00(297.00-659.00) | 412.00(282.00-585.50) | 0.47 |
| Successful recanalization, n (%) | 112(95.73) | 103(91.96) | 34(91.89) | 0.44 | 133(93.66) | 181(96.79) | 55(84.62) | 0.01 |

NIHSS indicates National Institutes of Health Stroke Scale; ASPECTS, Alberta Stroke Program Early CT Score; IVT, Intravenous thrombolysis; ASITN/SR grade, American Society of Interventional and Therapeutic Neuroradiology/Society of Interventional Radiology collateral score; IQR, interquartile range.

aIndicates using Fisher’s exact

**Table S2. The effect of systolic blood pressure in young and old patients**

|  | 18-64 years (SBP≤140 mmHg vs. >140 mmHg) | | | ≥ 65 years (SBP≤120 mmHg vs. >120 mmHg) | | |
| --- | --- | --- | --- | --- | --- | --- |
|  | Odds ratio (95% confidence interval) | | | Odds ratio (95% confidence interval) | | |
| Outcomes | Simple model | Adjusted model | Weighted model | Simple model | Adjusted model | Weighted model |
| mRS ordinal | 0.34(0.18-0.64) | 0.30(0.16-0.58) | 0.32(0.17-0.60) | 0.64(0.44-0.93) | 0.66(0.45-0.96) | 0.65(0.45-0.94) |
| mRS 0-2 | 0.46(0.23-0.92) | 0.42(0.20-0.89) | 0.40(0.20-0.79) | 0.63(0.42-0.96) | 0.60(0.38-0.96) | 0.66(0.43-1.00) |
| mRS 0-1 | 0.51(0.25-1.04) | 0.48(0.22-1.03) | 0.49(0.23-0.99) | 0.59(0.38-0.93) | 0.55(0.33-0.90) | 0.62(0.39-0.98) |
| Mortality | 5.89(2.52-13.76) | 7.11(2.78-18.20) | 4.19(1.71-9.91) | 1.27(0.75-2.15) | 1.38(0.79-2.40) | 1.29(0.77-2.21) |
| sICH | 3.58(1.13-11.32) | 3.34(0.94-11.95) | 2.43(0.67-8.89) | 1.22(0.60-2.50) | 1.35(0.65-2.83) | 1.78(0.85-4.09) |

mRS= modified Rankin score; sICH= symptomatic intracranial hemorrhage; NIHSS= National Institutes of Health Stroke Scale; ASPECTS=Alberta Stroke Program Early CT Score; ASITN/SR= American Society of Interventional and Therapeutic Neuroradiology/Society of Interventional Radiology collateral score.

Adjusted for admission NIHSS, ASPECTS, and etiology of stroke; and weighted for sex, hypertension, diabetes, pre-stroke, admission NIHSS, ASPECTS, ASITN/SR grade, stroke etiology, onset to recanalization time in young patients.

Adjusted for admission NIHSS, ASPECTS, etiology of stroke, and successful recanalization; and weighted for sex, hypertension, diabetes, pre-stroke, admission NIHSS, ASPECTS, ASITN/SR grade, stroke etiology, onset to recanalization time in old patients.

**Table S3. The association of SBP groups with clinical outcomes stratified by age in patients with successful recanalization**

|  |  | 18-64 years (n=249) | | | ≥ 65 years (n=369) | | |
| --- | --- | --- | --- | --- | --- | --- | --- |
| Outcomes | SBP groups | Odds ratio (95% confidence interval) | | | Odds ratio (95% confidence interval) | | |
| unadjusted model | Adjusted model | Weighted model | Unadjusted model | Adjusted model | Weighted model |
| mRS order | ≤120 mmHg | 2.88(1.42-5.84) | 3.40(1.66-6.98) | 2.91(1.47-5.78) | 1.85(1.05-3.24) | 1.99(1.12-3.54) | 2.15(1.24-3.76) |
|  | 120-140 mmHg | 3.23(1.57-6.64) | 3.18(1.54-6.57) | 3.18(1.60-6.38) | 1.07(0.63-1.82) | 1.20(0.70-2.07) | 1.29(0.77-2.19) |
|  | >140 mmHg | Reference | Reference | Reference | Reference | Reference | Reference |
| mRS 0-2 | ≤120 mmHg | 2.11(0.97-4.58) | 2.35(1.02-5.46) | 2.42(1.15-5.22) | 1.78(0.93-3.39) | 1.95(0.97-3.90) | 2.29(1.20-4.52) |
|  | 120-140 mmHg | 2.42(1.10-5.33) | 2.56(1.09-6.01) | 3.02(1.41-6.61) | 1.03(0.55-1.93) | 1.12(0.57-2.18) | 1.43(0.77-2.76) |
|  | >140 mmHg | Reference | Reference | Reference | Reference | Reference | Reference |
| mRS 0-1 | ≤120 mmHg | 2.17(0.97-4.86) | 2.43(1.02-5.79) | 2.07(0.96-4.67) | 1.95(0.95-3.98) | 2.12(0.97-4.60) | 2.07(1.02-4.42) |
|  | 120-140 mmHg | 2.26(1.00-5.10) | 2.29(0.96-5.47) | 2.17(1.01-4.92) | 1.04(0.51-2.11) | 1.11(0.52-2.37) | 1.22(0.61-2.59) |
|  | >140 mmHg | Reference | Reference | Reference | Reference | Reference | Reference |
| Mortality | ≤120 mmHg | 0.19(0.07-0.52) | 0.14(0.04-0.44) | 0.27(0.09-0.82) | 0.57(0.26-1.25) | 0.48(0.21-1.10) | 0.45(0.21-0.98) |
|  | 120-140 mmHg | 0.17(0.06-0.50) | 0.15(0.05-0.48) | 0.28(0.09-0.85) | 0.83(0.40-1.70) | 0.69(0.32-1.49) | 0.68(0.35-1.38) |
|  | >140 mmHg | Reference | Reference | Reference | Reference | Reference | Reference |
| sICH | ≤120 mmHg | 0.35(0.09-1.39) | 0.47(0.10-2.17) | 0.51(0.11-2.84) | 0.62(0.23-1.69) | 0.49(0.17-1.42) | 1.16(0.53-2.54) |
|  | 120-140 mmHg | 0.15(0.03-0.84) | 0.19(0.03-1.17) | 0.21(0.02-1.48) | 0.67(0.26-1.71) | 0.53(0.20-1.45) | 1.05(0.28-3.94) |
|  | >140 mmHg | Reference | Reference | Reference | Reference | Reference | Reference |

SBP= systolic blood pressure; mRS= modified Rankin score; sICH= symptomatic intracranial hemorrhage; NIHSS= National Institutes of Health Stroke Scale; ASPECTS=Alberta Stroke Program Early CT Score; ASITN/SR= American Society of Interventional and Therapeutic Neuroradiology/Society of Interventional Radiology collateral score.

Adjusted for admission NIHSS, ASPECTS, and etiology of stroke; and weighted for sex, hypertension, diabetes, pre-stroke, admission NIHSS, ASPECTS, ASITN/SR grade, stroke etiology, onset to recanalization time in young patients.

Adjusted for admission NIHSS, ASPECTS, and etiology of stroke; and weighted for sex, hypertension, diabetes, pre-stroke, admission NIHSS, ASPECTS, ASITN/SR grade, stroke etiology, onset to recanalization time in old patients.

**Table S4. Associations between SBP groups and outcomes in young (≤140 mmHg vs. >140 mmHg) and old (≤120 mmHg vs. >120 mmHg) patients with successful recanalization**

|  | 18-64 years (SBP≤140 mmHg vs. >140 mmHg) | | | ≥ 65 years (SBP≤120 mmHg vs. >120 mmHg) | | |
| --- | --- | --- | --- | --- | --- | --- |
|  | Odds ratio (95% confidence interval) | | | Odds ratio (95% confidence interval) | | |
| Outcomes | Unadjusted model | Adjusted model | Weighted model | Unadjusted model | Adjusted model | Weighted model |
| mRS ordinal | 0.31(0.16-0.61) | 0.29(0.15-0.57) | 0.29(0.15-0.54) | 0.62(0.42-0.91) | 0.64(0.43-0.94) | 0.62(0.42-0.91) |
| mRS 0-2 | 0.42(0.20-0.86) | 0.39(0.18-0.84) | 0.34(0.16-0.68) | 0.64(0.42-0.99) | 0.62(0.39-0.99) | 0.66(0.43-1.02 |
| mRS 0-1 | 0.43(0.20-0.92) | 0.41(0.18-0.91) | 0.40(0.18-0.82) | 0.59(0.37-0.94) | 0.57(0.34-0.94) | 0.63(0.39-1.01) |
| Mortality | 5.33(2.17-13.14) | 6.38(2.36-17.26) | 3.29(1.23-8.27) | 1.52(0.85-2.70) | 1.59(0.88-2.88) | 1.66(0.94-3.06) |
| sICH | 3.83(1.06-13.86) | 3.11(0.75-12.83) | 2.32(0.45-8.98) | 1.68(0.72-3.90) | 2.15(0.87-5.29) | 1.13(0.44-2.93) |

SBP= systolic blood pressure; mRS= modified Rankin score; sICH= symptomatic intracranial hemorrhage; NIHSS= National Institutes of Health Stroke Scale; ASPECTS=Alberta Stroke Program Early CT Score; ASITN/SR= American Society of Interventional and Therapeutic Neuroradiology/Society of Interventional Radiology collateral score.

Adjusted for admission NIHSS, ASPECTS, and etiology of stroke; and weighted for sex, hypertension, diabetes, pre-stroke, admission NIHSS, ASPECTS, ASITN/SR grade, stroke etiology, onset to recanalization time in young patients.

Adjusted for admission NIHSS, ASPECTS, and etiology of stroke; and weighted for sex, hypertension, diabetes, pre-stroke, admission NIHSS, ASPECTS, ASITN/SR grade, stroke etiology, onset to recanalization time in old patients.
